# Supplementary material for: Business and Market Analysis of Hydrothermal Carbonization Process: Roadmap toward Implementation
Source: MDPI journal article supplement (doi:10.3390/agronomy14030541), 2024-03-07
Supplement: s1 [file s1]

## **Business and Market Analysis of Hydrothermal Carbonization Process: Roadmap towards Implementation**

By Gianluigi Farru, Fabiano Bisinella Scheufele, Daniela Moloeznik Paniagua, Fritz Keller, Changyoon Jeong, Daniele Basso

### **Supplementary Materials**

#### **Survey's questions**

- *Section S1: General Information*

Company Name: \_\_\_\_\_

Please provide the location (Country, City) of the company headquarters/office: \_\_\_\_\_

Please provide the date of foundation of the company: \_\_\_\_\_

Please provide a contact person:

**Name:** \_\_\_\_\_

**Email:** \_\_\_\_\_

**Phone:** (Optional) \_\_\_\_\_

**Website:** \_\_\_\_\_

**Additional Information:** \_\_\_\_\_

- *Section S2: Technical Information of the Company*

Please provide the type of technology developed in your company.

\* In case of specific, hybrid or multiple types, please detail in "Other"

- ☐ HTC
- ☐ VTC
- ☐ HTT
- ☐ HTC + Gasification
- ☐ Other – please specify: \_\_\_\_\_

Please provide the type(s) of service that your company focuses.

\* In case of specific, please detail in "Other"

- ☐ Waste Management
- ☐ Energy
- ☐ Fertilizer
- ☐ Chemical (Platform chemicals)
- ☐ Advanced Materials
- ☐ Equipment and technology developer and supplier

- ☐ R&DI  
☐ other – please specify: \_\_\_\_\_

- *Section S3: Information about process and plants*

Please provide the plant location (Country, City): \_\_\_\_\_

Please provide the date of inauguration of the plant (or expected date): \_\_\_\_\_

Type of plant (full/pilot):

- ☐ Full  
☐ Demonstration  
☐ Pilot

Please provide information about the processing capacity of the plant: \_\_\_\_\_

*Suggestion:*

- Reactor(s) Size: Number and volume of reactor(s)
- Processing capacity: e.g. in tons/day (of feedstock or products)
- Operation mode: (Batch or continuous)

Please provide the feedstock(s) processed by the plant.

\* If necessary, please detail in "Other"

- ☐ Sewadge sludge  
☐ Municipal Solid Waste  
☐ Lignocellulosic residues (please detail)  
☐ Animal residues (please detail)  
☐ Food residues (please detail)  
☐ Industrial residues (please detail)

Please provide information about the goal and products of the plant.

\* In case of specific, different or multiple, please specify in "Other"

- ☐ Waste treatment/ Volume reduction  
☐ Energy production  
☐ Nutrient recovery (please detail)  
☐ Chemicals (please detail)  
☐ Advanced materials (please detail)  
☐ Other – please specify: \_\_\_\_\_

Please provide the range of process conditions of the plant

*Suggestion:*

Type of reactor: \_\_\_\_\_  
Temperature range: \_\_\_\_\_  
Pressure range: \_\_\_\_\_  
Time: \_\_\_\_\_  
Catalyst: \_\_\_\_\_  
Other specifications: (please detail) \_\_\_\_\_

A brief description of the technological route and process details can be provided here. In case of multiple plants, you can:

- (1) provide multiple inputs to this survey; or
- (2) send information by email.

---

- *Section S4: Policy section (additional section)*

New technology and its products generally have obstacles due to legislation. Business models are very linked to the policy. We would like to understand in this section how policy is influencing HTC cases.

What are the main legislation/policy obstacles the company has faced (or is facing) in order to develop and to implement hydrothermal carbonization plants/products? if you put the specific regulation number/name would help a lot. Feel free to put local, national or international regulations.

Answer: \_\_\_\_\_

What specifics do you consider the laws/ policies should change in order to have more HTC successful stories?

Answer: \_\_\_\_\_

Do you consider that current legislation favors competing technologies (pyrolysis, gasification, anaerobic digestion, etc.)? if yes, how?

Answer: \_\_\_\_\_

Is there anything else you would like to add regarding legislation/policy topic?

Answer: \_\_\_\_\_

Feel free to share your stories, your complaints, your expectations to future regulation development

Answer: \_\_\_\_\_

- *Section S5: Other (Optional)*

Any other relevant information you may judge necessary about the company or plant(s) can be detailed here.

---

We would appreciate any suggestion or feedback you can give us here.

---
